# Supplementary material for: Ustilaginoidea virens Nuclear Effector SCRE4 Suppresses Rice Immunity via Inhibiting Expression of a Positive Immune Regulator OsARF17
Source: MDPI journal article supplement (doi:10.3390/ijms231810527), 2022-09-10
Supplement: s1 [file s1]

## Supplementary Material

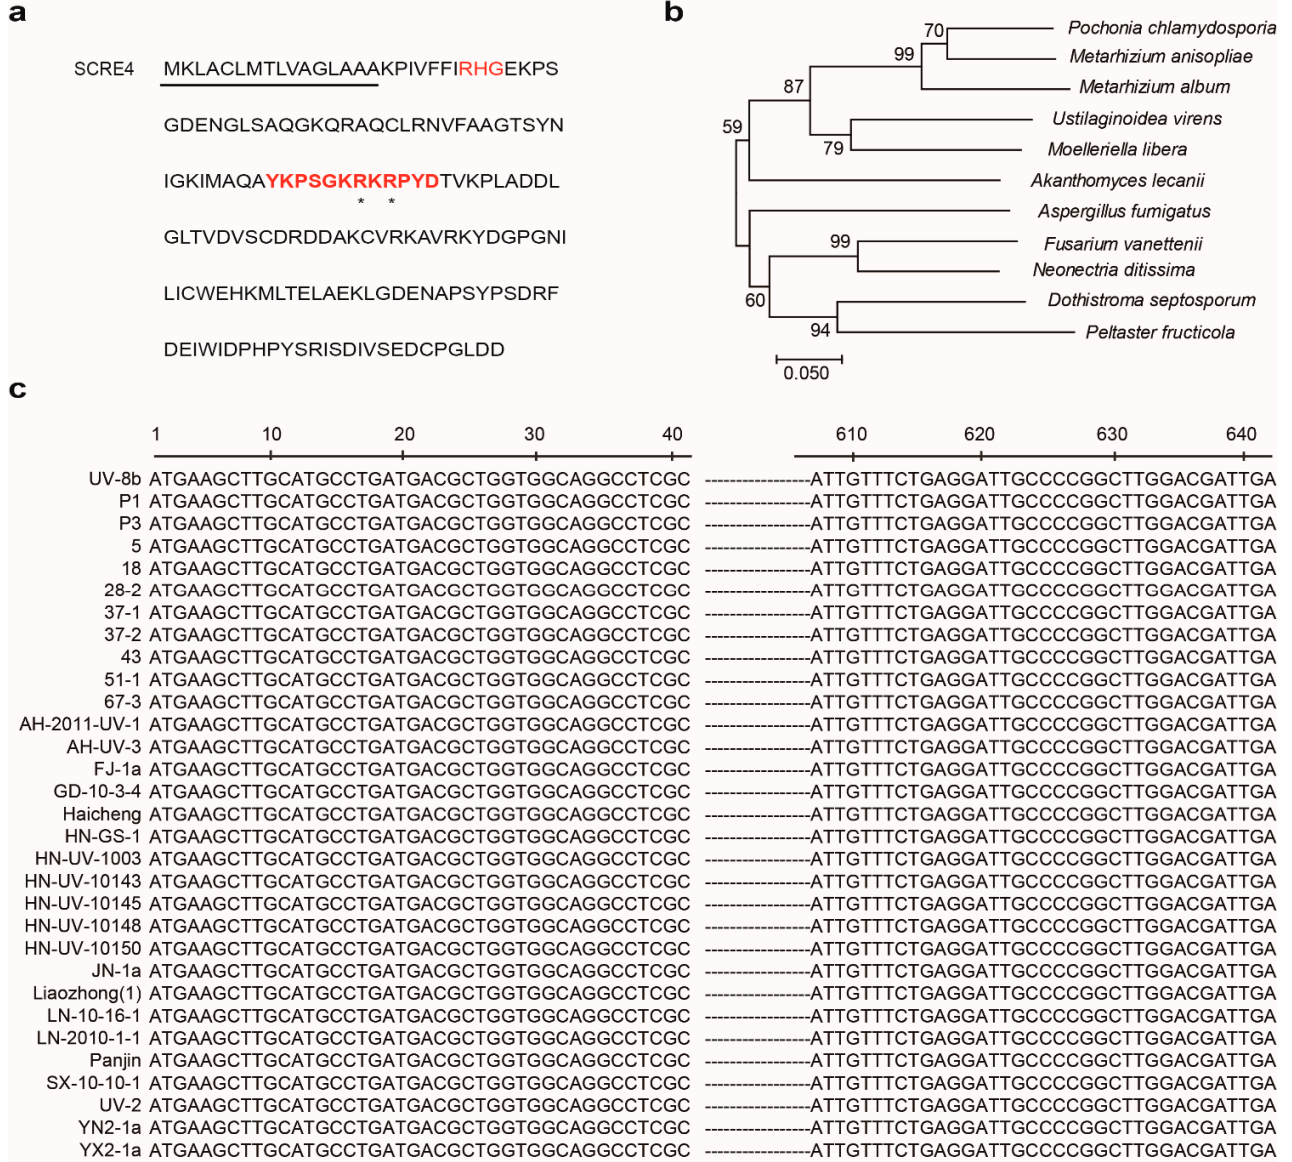

**Figure S1.** The highly conserved protein SCRE4 in *Ustilaginoidea virens* contains the putative signal peptide and nuclear localization signal. (a) The amino acid sequences of SCRE4 in *U. virens*. The signal peptide predicted by SignalP-5.0 is underlined, and the putative nuclear localization signal (NLS) predicted by cNLS mapper is highlighted in bold and red, in which the two conserved basic residues Arg73 and Arg75 are indicated by asterisks. 'RHG' motif is highlighted in red. (b) The phylogenetic tree generated for SCRE4 homologs from different fungal species predicted by BLASTp. The neighbor-joining method was used to construct the tree using MEGA 7.0 program. Accession numbers for the sequences of SCRE4 homologs in different fungal species are as follows: *Pochonia chlamydosporia* XP\_018139175.1, *Metarhizium anisopliae* KFG79890.1, *Metarhizium album* XP\_040675940.1, *Ustilaginoidea virens* XP\_043001097.1, *Moelleriella libera* OAA33337.1, *Akanthomyces lecanii* OAR00280.1, *Aspergillus fumigatus* OXN06976.1, *Fusarium vanettenii* XP\_003047861.1, *Neonectria ditissima* KPM34476.1, *Dothistroma septosporum* EME39468.1 and *Peltaster fruticola* QIX00063.1. (c) Alignment analysis of SCRE4 coding sequences of 31 *U. virens* isolates collected from different regions in China.

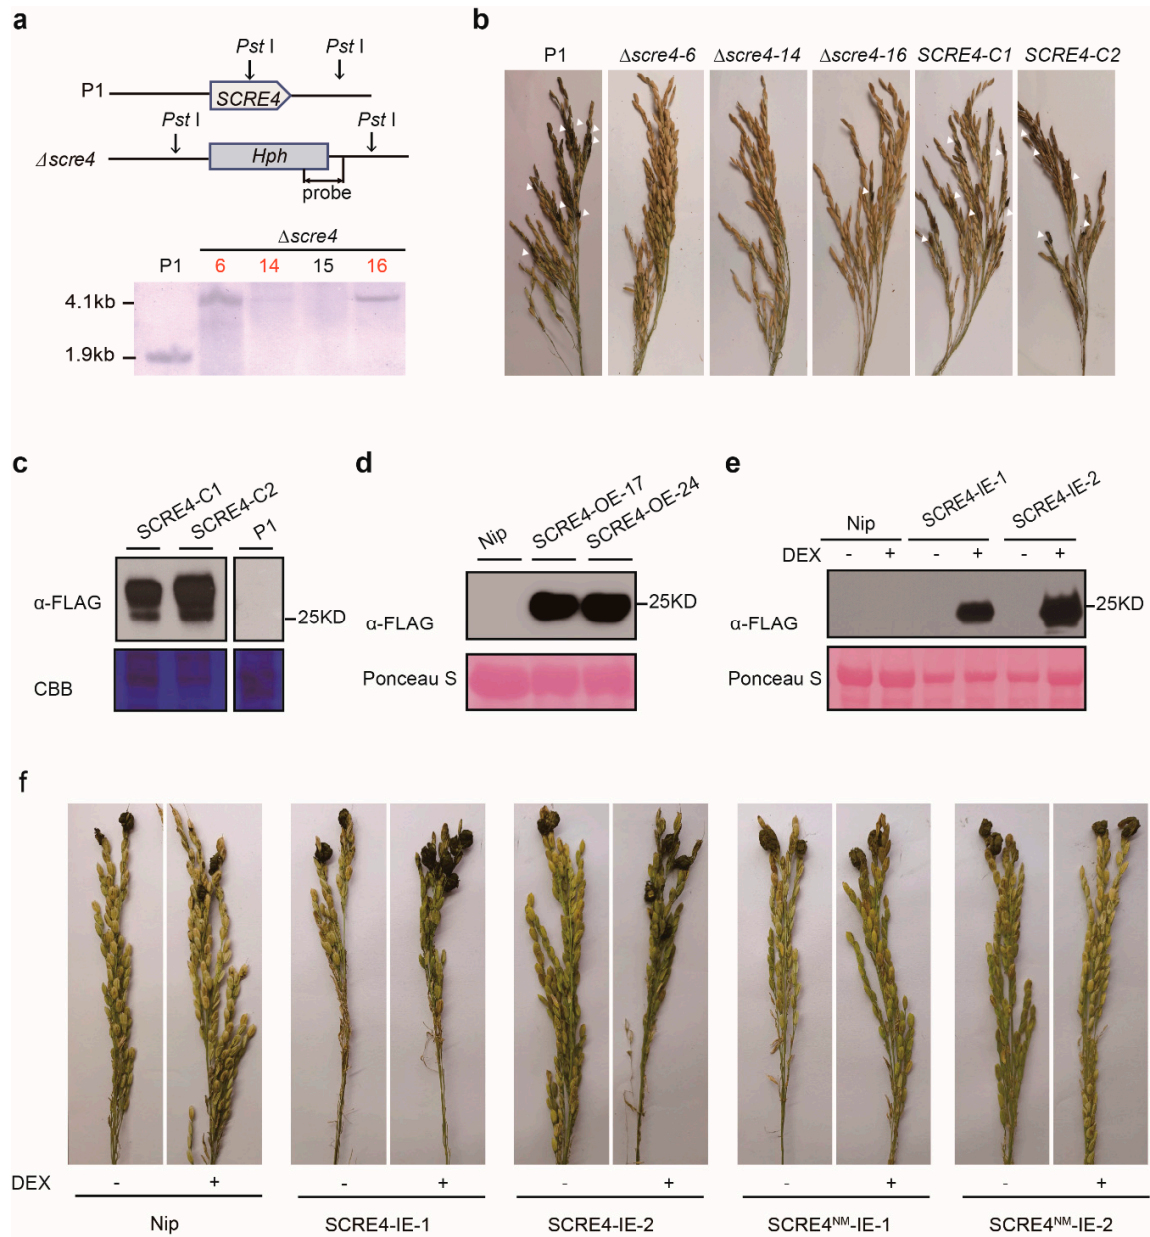

**Figure S2.** *SCRE4* is an essential virulent factor. (a) Southern blot analysis to confirm the *scre4* knockout mutants. Genomic DNA isolated from the wild-type and candidate *scre4* knockout lines was digested by *Pst*I overnight. After being separated on agarose gel, the digested DNA was blotted on nylon membrane and was hybridized with the digoxin-labelled probe. The confirmed mutants were marked in red. (b) Disease symptoms on the representative rice panicles after *U. virens* inoculation. The images were captured at 4 weeks after rice panicles of LYP9 were inoculated by the wild-type (P1), different *scre4* knockout and complemented strains (*SCRE4-C1* and *SCRE4-C2*), the positions of false smut balls were indicated by white triangles. (c) Western blot analyses to detect expression of FLAG-tagged *SCRE4* in complemented strains (*SCRE4-C1* and *SCRE4-C2*). Protein loading is indicated by Coomassie Brilliant Blue (CBB). (d-e) Western blot analyses to detect expression of FLAG-tagged proteins in the *SCRE4*-OE-17/-24 lines (d), and *SCRE4*-IE-1/-2 transgenic lines (e). Total proteins were extracted from the seedlings of the transgenic lines and were detected with an anti-FLAG ( $\alpha$ -FLAG) antibody. The *SCRE4*-IE-1/-2 and *SCRE4*<sup>NM</sup>-IE-1/-2 transgenic seedlings were treated with DEX (1  $\mu$ M) and mock before protein extraction. Protein loading is indicated by Ponceau S staining. (f) Disease symptoms on the representative panicles of the *SCRE4*-IE and *SCRE4*<sup>NM</sup>-IE transgenic lines after *U. virens* inoculation. The images were captured at 4 weeks after the transgenic lines were inoculated with the *U. virens* strain JS60-2. The *SCRE4*-IE and *SCRE4*<sup>NM</sup>-IE transgenic lines were treated with DEX and mock at 24 h before *U. virens* inoculation.

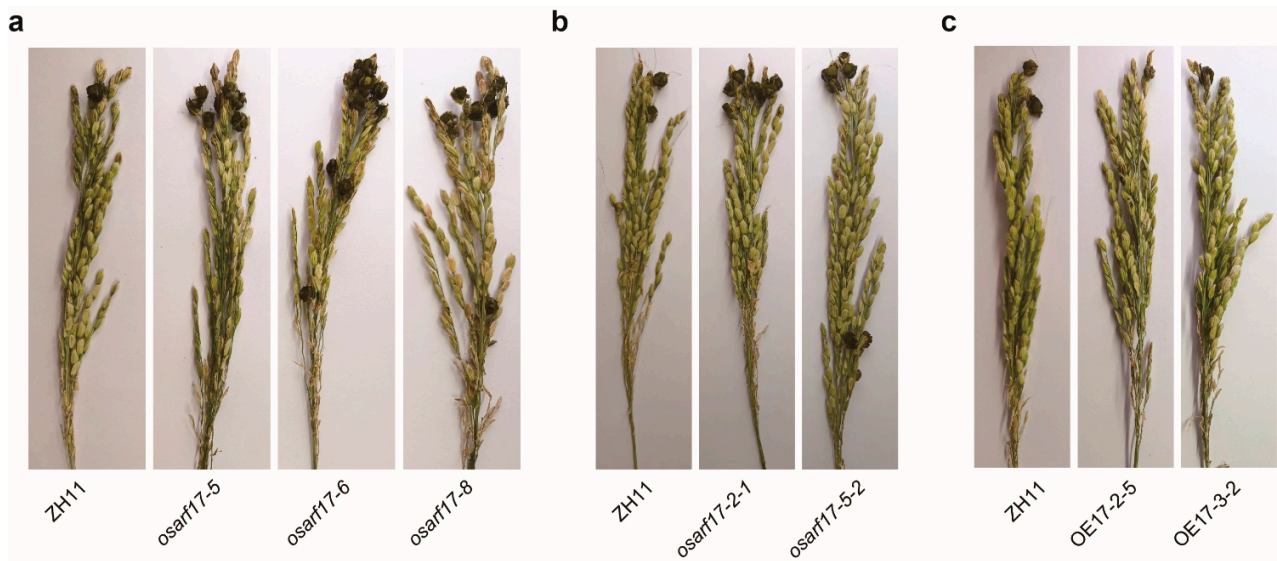

**Figure S3.** OsARF17 positively regulates rice resistance against *U. virens* infection. **(a-b)** Disease symptoms on inoculated panicles of the wild-type (ZH11) and different *osarf17* mutant lines. The *osarf17-5*, *osarf17-6*, and *osarf17-8* knockout lines in **(a)** and *osarf17-2-1* and *osarf17-5-2* knockout lines in **(b)** were generated with two distinct sgRNAs. **(c)** Disease symptoms on inoculated panicles of the wild-type, OE17-2-5 and OE17-3-2 transgenic lines. **(a-c)** The representative images were captured at 4 weeks after the wild-type and transgenic plants were injection inoculated with the *U. virens* isolate PJ52.

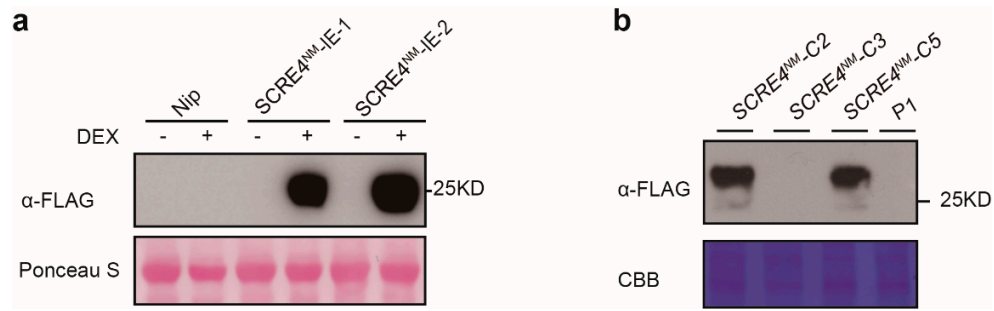

**Figure S4.** SCRE4<sup>NM</sup>-FLAG expression was detected via immunoblotting. **(a)** Western blot analyses to detect expression of FLAG-tagged proteins in the SCRE4<sup>NM</sup>-IE-1/-2 transgenic lines. Total proteins were extracted from the seedlings of the transgenic lines and were detected with an anti-FLAG ( $\alpha$ -FLAG) antibody. SCRE4<sup>NM</sup>-IE-1/-2 transgenic seedlings were treated with DEX (1  $\mu$ M) and mock before protein extraction. Protein loading is indicated by Ponceau S staining. **(b)** Western blot analyses to detect expression of FLAG-tagged SCRE4<sup>NM</sup> in complemented strains (SCRE4<sup>NM</sup>-C2 and SCRE4<sup>NM</sup>-C5). Protein loading is indicated by CBB.

**Table S1.** The primers in this study

| Primer name                                                                       | sequence                                                 |
|-----------------------------------------------------------------------------------|----------------------------------------------------------|
| <b>pSUC2</b>                                                                      |                                                          |
| pSUC2-SCRE4-EcoRI-F                                                               | attgaattcatgaagcttgcctgatgac                             |
| pSUC2-SCRE4-XhoI-R                                                                | attctcgagactcagtcctgtctcgc                               |
| <b>pYF11</b>                                                                      |                                                          |
| pYF11-RP27:SCRE4-F                                                                | tttcgtaggaaccaatcttcaaatgaagcttgcctgatgac                |
| pYF11-RP27:SCRE4-R                                                                | caccacccgggtgaacagctcctgccttgtcacatgtccaagccg<br>gggcaat |
| <b>Primers for construction of SCRE4 knockout mutant and complemented strains</b> |                                                          |
| CRISPR-SCRE4-F                                                                    | acct gcttgcctgatgacgc                                    |
| CRISPR-SCRE4-R                                                                    | aaacgcgtcatcaggcatgcaagc                                 |
| SCRE4-S1-F                                                                        | ggtgccgcagacaagggtac                                     |
| SCRE4-S2-R                                                                        | gccgaccgggaaccagttatcggcggtgtccccgacta                   |
| SCRE4-S3-F                                                                        | tagtcgggggacatccgccgataactggtcccggtcggc                  |
| SCRE4-S4-R                                                                        | gcttgcctcatcagtttggtttagtcgtcaggcgggt                    |
| SCRE4-S5-F                                                                        | caccgcctgacgactaaacaaactggatgatggggcaagc                 |
| SCRE4-S6-R                                                                        | ctcagccgtgcaggaaccagcaat                                 |
| pY2P102-SCRE4-XhoI-F                                                              | attctcgaggcgattggcgtttcacga                              |
| pY2P102-SCRE4-EcoRI-R                                                             | attgaattcatcgtccaagccggggcaatc                           |
| Soeing-SCRE4 <sup>NM</sup> -F                                                     | tagtcgggggacatccgccatgaagcttgcctgat                      |
| Soeing-SCRE4 <sup>NM</sup> -R                                                     | atcaggcatgcaagcttcatggcgatgtccccgacta                    |
| <b>Primers for transient expression in <i>Nicotiana benthamiana</i></b>           |                                                          |
| pGD-SCRE4 <sup>ASP</sup> -RFP-XhoI-F                                              | ctctacaagatctcgagatgaaaccaatcgtcttctcatccgc              |
| pGD-SCRE4 <sup>ASP</sup> -RFP-SalI-R                                              | ggaggaggccatgtcgacatcgtccaagccggggcaat                   |
| <b>Primers for transient expression in rice protoplast</b>                        |                                                          |
| pUC19-ProOsARF17:GFP-XhoI-F                                                       | attctcgagatggtgagcaagggcgagga                            |
| pUC19-ProOsARF17:GFP-PstI-R                                                       | attctgcagttactgtacagctcgtccat                            |
| pUC19-SCRE4 <sup>ASP</sup> -3×FLAG-XhoI -F                                        | attctcgagatgaaaccaatcgtcttctcatccgc                      |
| pUC19-SCRE4 <sup>ASP</sup> -3×FLAG-BstBI-R                                        | attttcgaaatcgtccaagccggggcaat                            |
| pRTV-SCRE4 <sup>ASP</sup> -cGFP-SacI-F                                            | ggatccccgggtgagctcatgaaaccaatcgtcttctcatccgc             |
| pRTV-SCRE4 <sup>ASP</sup> -cGFP-HindIII-R                                         | cgcactagtaagcttatcgtccaagccggggcaat                      |
| pRTV-SCRE4 <sup>ASP</sup> -cRFP-BamHI-F                                           | cagatccagtgggatccatgaaaccaatcgtcttctcatccgc              |
| pRTV-SCRE4 <sup>ASP</sup> -cRFP-HindIII-R                                         | cgcactagtaagcttatcgtccaagccggggcaat                      |
| pRTV-RFP-NLS-BamHI-F                                                              | cagatccagtgggatccatgagcagctgatt                          |
| pRTV-RFP-NLS-Mid-R                                                                | ttatacttttcttttttggcttgtagctcgtccatgccgcccttg<br>cccca   |
| pRTV-RFP-NLS-HindIII-R                                                            | cgcactagtaagctttatacttttcttttcttttggc                    |
| pUC19-UV8b_03835 <sup>ASP</sup> -3×FLAG-XhoI-F                                    | attctcgagatgactccgtgccatgctccga                          |
| pUC19-UV8b_03835 <sup>ASP</sup> -3×FLAG-BstBI-R                                   | attttcgaaagggttgca aaaatccccggta                         |
| pUC19-UV8b_03279 <sup>ASP</sup> -3×FLAG-XhoI -F                                   | attctcgagatgatccctgaacgccacccat                          |
| pUC19-UV8b_03279 <sup>ASP</sup> -3×FLAG-BstBI-R                                   | attttcgaaaggcgaaatctgtatcaatatctgt                       |
| <b>Primers for construction of transgenic rice plants</b>                         |                                                          |
| pTA7001-SCRE4-XhoI-F1                                                             | attctcgagatgaagcttgcctgatgac                             |
| pTA7001-SCRE4 <sup>NM</sup> -R2                                                   | cggggcctttgcttgccacttggtgttaggcctgggc                    |
| pTA7001-SCRE4 <sup>NM</sup> -F3                                                   | gtggcaaggcaaggccccgtacgatactgtcaagccgt                   |
| pTA7001-SCRE4-3FLAG-SpeI-R4                                                       | attactagttcacttatcgtcatcg                                |
| pC1305-SCRE4 <sup>ASP</sup> -FLAG-KpnI-F                                          | gtgtacagagctcggtacatgaaaccaatcgtcttctcatccgc             |
| pC1305-SCRE4 <sup>ASP</sup> -FLAG-HindIII-R                                       | tggtctttgtagtaagcttatcgtccaagccggggcaat                  |
| <b>Primers for Dual-LUC reporter assays</b>                                       |                                                          |

---

|                                               |                                              |
|-----------------------------------------------|----------------------------------------------|
| pGreenII0800-proOsARF17-KpnI-F                | ctcactatagggcgaattgggtacctctaaattataatccac   |
| pGreenII0800-proOsARF17-PstI-R                | aactagtggatccccgggctgcagttttcttctttctctctctc |
| pGD-UV8b_03835 <sup>ASP</sup> -RFP-XhoI-F     | ctctacaagatctcgagatgatccctcgaacgccacccat     |
| pGD-UV8b_03835 <sup>ASP</sup> -RFP-SalI-R     | ggaggaggccatgtcgacaggttgcaaaaatccccggta      |
| pGD-UV8b_03279 <sup>ASP</sup> -RFP-XhoI-F     | ctctacaagatctcgagatgatccctcgaacgccacccat     |
| pGD-UV8b_03279 <sup>ASP</sup> -RFP-SalI-R     | ggaggaggccatgtcgacggcgcaatctgtatcaatatct     |
| pGD-SCRE4 <sup>ASP</sup> -RFP-XhoI-F          | ctctacaagatctcgagatgaaaccaatcgcttcttcatccgc  |
| pGD-SCRE4 <sup>ASP</sup> -RFP-SalI-R          | ggaggaggccatgtcgacatcgccaagccggggcaat        |
| <b>Conservation analysis of SCRE4</b>         |                                              |
| SCRE4-F                                       | catggagcaccgaggcactaa                        |
| SCRE4-R                                       | gtgcagttccacgcgcaggc                         |
| <b>SCRE4 specific probe for Southern blot</b> |                                              |
| SCRE4-probe-F                                 | gcacgagattcttcgcctc                          |
| SCRE4-probe-R                                 | tcagggtctgtttccgacga                         |
| <b>qRT</b>                                    |                                              |
| OsGAPDH-qF                                    | aagccagcatcctatgatcagatt                     |
| OsGAPDH-qR                                    | cgtaaccagaatacccttgagttt                     |
| OsARF17-qF                                    | cgccggaagctgtagaagaa                         |
| OsARF17-qR                                    | agctacctgttcgtgtgac                          |
| SCRE4-qF                                      | gcacaagatgctcacggaac                         |
| SCRE4-qR                                      | cggggcaatcctcagaaaca                         |
| $\alpha$ -tubulin-1-qF                        | aggttgcgtgaaggaggtt                          |
| $\alpha$ -tubulin-1-qR                        | gaggtggagttgccgataaa                         |

---

**Table S2.** The strains and reagent in this study

| <b>Strains</b>                                        | <b>Source/ reference</b>                            |
|-------------------------------------------------------|-----------------------------------------------------|
| <i>Escherichia coli</i> DH5 $\alpha$                  | Lab collection                                      |
| <i>Agrobacterium tumefaciens</i>                      |                                                     |
| EHA105                                                | Lab collection                                      |
| GV3101(pSoup)                                         | ZomanBio, ZC1406                                    |
| <i>Magnaporthe oryzae</i>                             |                                                     |
| Guy11                                                 | Zhengguang Zhang at Nanjing Agricultural University |
| <i>Ustilaginoidea virens</i>                          |                                                     |
| P1                                                    | Lab collection                                      |
| JS60-2                                                | Zhaoxi Luo at Huazhong Agricultural University      |
| PJ52                                                  | Jing Fan at Sichuan Agricultural University         |
| <b>Yeast</b>                                          |                                                     |
| YTK12                                                 | Zymo Research                                       |
| XK125                                                 | Zhengguang Zhang at Nanjing Agricultural University |
| <b>Reagent</b>                                        | <b>Source/ reference</b>                            |
| anti-FLAG M2 monoclonal antibody                      | Sigma-Aldrich, F1804                                |
| HRP-conjugated anti-HA monoclonal antibody            | Roche, 11667475001                                  |
| Phospho-p44/42 MAPK (Erk1/2) (Thr202/Tyr204) Antibody | Cell Signaling Technology, 9101                     |
| anti- $\beta$ -Actin Mouse monoclonal antibody        | CWBIO, CW0096M                                      |
| anti-GFP Mouse monoclonal antibody                    | LABLEAD, G1002                                      |
| Goat anti-Mouse IgG, HRP Conjugated                   | CWBIO, CW0102S                                      |
| Goat anti-Rabbit IgG, HRP Conjugated                  | CWBIO, CW0103S                                      |
| Dual-Lumi <sup>TM</sup> II luciferase Assay Kit       | YEASEN, 11402ES60                                   |



**Table S3.** 31 *U. virens* isolates from different regions in China

| <b>Name</b>   | <b>origin region</b>                                 |
|---------------|------------------------------------------------------|
| Uv-8b         | Huazhong Agricultural University                     |
| P1            | Jiangsu Academy of Agricultural Sciences             |
| P3            | Unknown                                              |
| 5             | Xuzhou City, Jiangsu Province                        |
| 18            | Xuzhou City, Jiangsu Province                        |
| 28-2          | Suzhou City, Jiangsu Province                        |
| 37-1          | Nanjing City, Jiangsu Province                       |
| 37-2          | Lishui County, Nanjing City, Jiangsu Province        |
| 43            | Nanjing City, Jiangsu Province                       |
| 51-1          | Yancheng City, Jiangsu Province                      |
| 67-3          | Nantong City, Jiangsu Province                       |
| AH-2011-UV-1  | Anhui Province                                       |
| AH-UV-3       | Anhui Province                                       |
| FJ-1a         | Nanjing County, Zhangzhou City, Fujian Province      |
| GD-10-3-4     | Guangdong Province                                   |
| Haicheng      | Haicheng City, Liaoning Province                     |
| HN-GS-1       | Luoshan County, Xinyang City, Henan Province         |
| HN-UV-1003    | Taojiang County, Yiyang City, Hunan Province         |
| HN-UV-10143   | Hanshou County, Changde City, Hunan Province         |
| HN-UV10145    | Changde City, Hunan Province                         |
| HN_UV-10148   | Xiangtan City, Hunan Province                        |
| HN-UV-10150   | Anren County, Chenzhou City, Hunan Province          |
| JN-1a         | Licheng District, Jinan City, Shandong Province      |
| Liaozhong (1) | Liaozhong District, Shenyang City, Liaoning Province |
| LN-10-16-1    | Donggang City, Liaoning Province                     |
| LN-2010-1-1   | Gushan Town, Donggang City, Liaoning Province        |
| Panjin        | Panjin City, Liaoning Province                       |
| SX-10-10-1    | Nanzheng County, Hanzhong City, Shanxi Province      |
| UV-2          | Jiangshu Academy of Agricultural Sciences            |
| YN2-1a        | Yunnan Province                                      |
| YX2-1a        | Yangxin County, Huangshi City, Hubei Province        |
